# Supplementary material for: Methylnaltrexone for Opioid-Induced Constipation in Advanced Illness
Source: Atypon-hosted journal article supplement (doi:10.1056/nejmoa0707377), 2008-05-28
Supplement: nejm_thomas_2332sa1.pdf [file nejm_thomas_2332sa1.pdf]

## Supplementary Appendix

This appendix has been provided by the authors to give readers additional information about their work.

Supplement to: Thomas J, Karver S, Cooney GA, et al. Methylnaltrexone for opioid-induced constipation in advanced illness. *N Engl J Med* 2008;358:2332-43.

**On-Line Table 1. Inclusion and Exclusion Criteria for Open-Label Extension Study**

| <b>Inclusion Criteria</b>                                                                                                                                                                                                                                                                                                                                                                                                                                                                                                                                 | <b>Exclusion Criteria</b>                                                                                                                                                                                                                                                                                                                                                                                                                                                         |
|-----------------------------------------------------------------------------------------------------------------------------------------------------------------------------------------------------------------------------------------------------------------------------------------------------------------------------------------------------------------------------------------------------------------------------------------------------------------------------------------------------------------------------------------------------------|-----------------------------------------------------------------------------------------------------------------------------------------------------------------------------------------------------------------------------------------------------------------------------------------------------------------------------------------------------------------------------------------------------------------------------------------------------------------------------------|
| <ul style="list-style-type: none"><li>• Patients must have been enrolled in the study and provided signed informed consent within 28 days after the end-of-study visit in the randomized study and <math>\geq 14</math> days after receiving the first dose of study drug in the randomized study</li><li>• Patients (or legal representative) had to provide written informed consent</li><li>• Women of childbearing age had to be using effective birth control and have a negative pregnancy test at screening</li><li>• Stable vital signs</li></ul> | <ul style="list-style-type: none"><li>• Women who were pregnant or nursing</li><li>• Participation in any other studies involving investigational products, other than methylnaltrexone, within 30 days before screening</li><li>• Any disease process suggestive of mechanical gastrointestinal obstruction (eg, tumor adhesion)</li><li>• Clinically significant active diverticular disease</li><li>• Evidence of fecal impaction</li><li>• Surgically acute abdomen</li></ul> |

**On-Line Table 2. Effect of Baseline Characteristics on Laxation Response Within 4 Hours of the First Double-Blind Dose: Responders vs Nonresponders in Methylnaltrexone-Treated Patients**

| <b>Variable</b>        | <b>Responder<br/>n/N (%)</b> | <b>Nonresponder<br/>n/N (%)</b> | <b>Adjusted Odds Ratio<br/>(95% CI)</b> | <b>p-Value</b> |
|------------------------|------------------------------|---------------------------------|-----------------------------------------|----------------|
| WHO Performance Status |                              |                                 |                                         |                |
| 1 and 2                | 9/17 (52.9)                  | 8/17 (47.1)                     | 0.714 (0.211, 2.420)                    | 0.5885         |
| 3 and 4                | 21/45 (46.7)                 | 24/45 (53.3)                    |                                         |                |
| Cancer                 |                              |                                 |                                         |                |
| No                     | 7/15 (46.7)                  | 8/15 (53.3)                     | 1.278 (0.318, 5.139)                    | 0.7300         |
| Yes                    | 23/47 (48.9)                 | 24/47 (51.1)                    |                                         |                |
| Age                    |                              |                                 | 1.013 (0.971, 1.056)*                   | 0.5583         |
| Opioid Usage           |                              |                                 | 1.000 (0.999, 1.000)†                   | 0.5117         |

\*Per 1-year increment.

†Per 1-mg/day increment.

**On-Line Table 3. Global Clinical Impression of Change (GCIC) ratings (analysis set: ITT)**

| Statistics    | Placebo<br>(N=71) |            | MNTX<br>(N= 62) |            |
|---------------|-------------------|------------|-----------------|------------|
|               | Patient           | Clinician  | Patient         | Clinician  |
| <b>Day 7</b>  |                   |            |                 |            |
| N*            | 57                | 57         | 49              | 49         |
| Better†       | 20 (35.1%)        | 20 (35.1%) | 36 (73.5%)      | 34 (69.4%) |
| No Change     | 34 (59.6%)        | 35 (61.4%) | 12 (24.5%)      | 15 (30.6%) |
| Worse         | 2 (3.5%)          | 2 (3.5%)   | 0 (0%)          | 0 (0%)     |
| <b>Day 14</b> |                   |            |                 |            |
| N*            | 56                | 56         | 53              | 53         |
| Better†       | 25 (44.6%)        | 28 (50.0%) | 36 (67.9%)      | 36 (67.9%) |
| No Change     | 27 (48.2%)        | 25 (44.6%) | 14 (26.4%)      | 16 (30.2%) |
| Worse         | 2 (3.6%)          | 3 (5.4%)   | 2 (3.8%)        | 1 (1.9%)   |

\*N=number with patient rating, clinician rating, or both; percents are based on these numbers. The patient rating was not done by 1 patient in each treatment group on Day 7 and by 2 patients in the placebo group and 1 patient in the MNTX group on Day 14. Patients with no patient or clinician ratings for either day were not included in this table.

†Better: Includes responses of Much Better, Somewhat Better and Slightly Better. Worse: Includes responses of Much Worse, Somewhat Worse and Slightly Worse.

**On-Line Table 4. Patients with Serious Adverse Events**

| <b>Adverse Event</b>                                                      | <b>Placebo (n=71)<br/>N (%)</b> | <b>Methylalntrexone (n=63)<br/>N (%)</b> |
|---------------------------------------------------------------------------|---------------------------------|------------------------------------------|
| Patients with $\geq 1$ serious adverse event                              | 20 (28.2)                       | 11 (17.5)                                |
| Cardiac disorders                                                         |                                 |                                          |
| Congestive heart failure aggravated                                       | 1 (1.4)                         | 1 (1.6)                                  |
| Coronary artery disease aggravated                                        | 0 (0.0)                         | 1 (1.6)                                  |
| Cyanosis                                                                  | 1 (1.4)                         | 0 (0.0)                                  |
| Myocardial ischemia                                                       | 0 (0.0)                         | 1 (1.6)                                  |
| Gastrointestinal disorders                                                |                                 |                                          |
| Abdominal pain                                                            | 1 (1.4)                         | 0 (0.0)                                  |
| Constipation                                                              | 1 (1.4)                         | 0 (0.0)                                  |
| General disorders/administration site conditions                          |                                 |                                          |
| Asthenia                                                                  | 1 (1.4)                         | 0 (0.0)                                  |
| Concomitant disease progression                                           | 1 (1.4)                         | 2 (3.2)                                  |
| Pain exacerbated                                                          | 1 (1.4)                         | 0 (0.0)                                  |
| Infections/infestations                                                   |                                 |                                          |
| Pneumonia                                                                 | 1 (1.4)                         | 0 (0.0)                                  |
| Investigations                                                            |                                 |                                          |
| International normalized ratio increased                                  | 1 (1.4)                         | 0 (0.0)                                  |
| Metabolism and nutrition disorders                                        |                                 |                                          |
| Dehydration                                                               | 2 (2.8)                         | 0 (0.0)                                  |
| Neoplasms benign, malignant, and unspecified (including cysts and polyps) |                                 |                                          |
| Malignant neoplasm progression                                            | 12 (16.9)                       | 7 (11.1)                                 |
| Nervous system disorders                                                  |                                 |                                          |
| Coma                                                                      | 1 (1.4)                         | 0 (0.0)                                  |
| Convulsions                                                               | 1 (1.4)                         | 0 (0.0)                                  |
| Progressive multiple sclerosis                                            | 1 (1.4)                         | 0 (0.0)                                  |
| Psychiatric disorders                                                     |                                 |                                          |
| Aggression                                                                | 0 (0.0)                         | 1 (1.6)                                  |
| Suicidal ideation                                                         | 0 (0.0)                         | 1 (1.6)                                  |
| Renal and urinary disorders                                               |                                 |                                          |
| Renal failure                                                             | 1 (1.4)                         | 0 (0.0)                                  |
| Respiratory, thoracic, and mediastinal disorders                          |                                 |                                          |
| Chronic obstructive airways disease exacerbated                           | 1 (1.4)                         | 0 (0.0)                                  |
| Dyspnea                                                                   | 2 (2.8)                         | 0 (0.0)                                  |
| Dyspnea exacerbated                                                       | 0 (0.0)                         | 1 (1.6)                                  |
| Pulmonary congestion                                                      | 1 (1.4)                         | 0 (0.0)                                  |
| Pulmonary embolism                                                        | 1 (1.4)                         | 0 (0.0)                                  |

---

|                    |         |         |
|--------------------|---------|---------|
| Respiratory arrest | 0 (0.0) | 1 (1.6) |
| Tracheal stenosis  | 1 (1.4) | 0 (0.0) |
| Vascular disorders |         |         |
| Aneurysm ruptured  | 0 (0.0) | 1 (1.6) |
| Gangrene           | 1 (1.4) | 0 (0.0) |
| Hypotension        | 1 (1.4) | 0 (0.0) |

---

N=Number of patients who received at least one dose of study drug. Patients were counted only once for each body system and once for each preferred term.
